# Supplementary material for: Chiral [NaMnIIMnIII3] and [Na2MnII2MnIII6] clusters constructed by chiral multidentate Schiff-base ligands: synthesis, structures, CD spectra and magnetic properties
Source: Royal Society of Chemistry journal article supplement (doi:10.1039/c3dt51874d), 2013-12-02
Supplement: c3dt51874d.pdf [file c3dt51874d.pdf]

## Supporting Information

### Chiral $[\text{NaMn}^{\text{II}}\text{Mn}^{\text{III}}_3]$ and $[\text{Na}_2\text{Mn}^{\text{II}}_2\text{Mn}^{\text{III}}_6]$ Clusters Constructed by Chiral Multidentate Schiff-Base Ligands: Synthesis, Structures, CD Spectra and Magnetic Properties

Ye Song,<sup>a‡</sup> Guonan Zhang,<sup>a‡</sup> Xiaoting Qin,<sup>a</sup> Yanfei Gao,<sup>a</sup> Shuai Ding,<sup>a</sup> Yanqin Wang,<sup>a</sup>

Chunfang Du<sup>a</sup> and Zhiliang Liu<sup>\*a,b</sup>

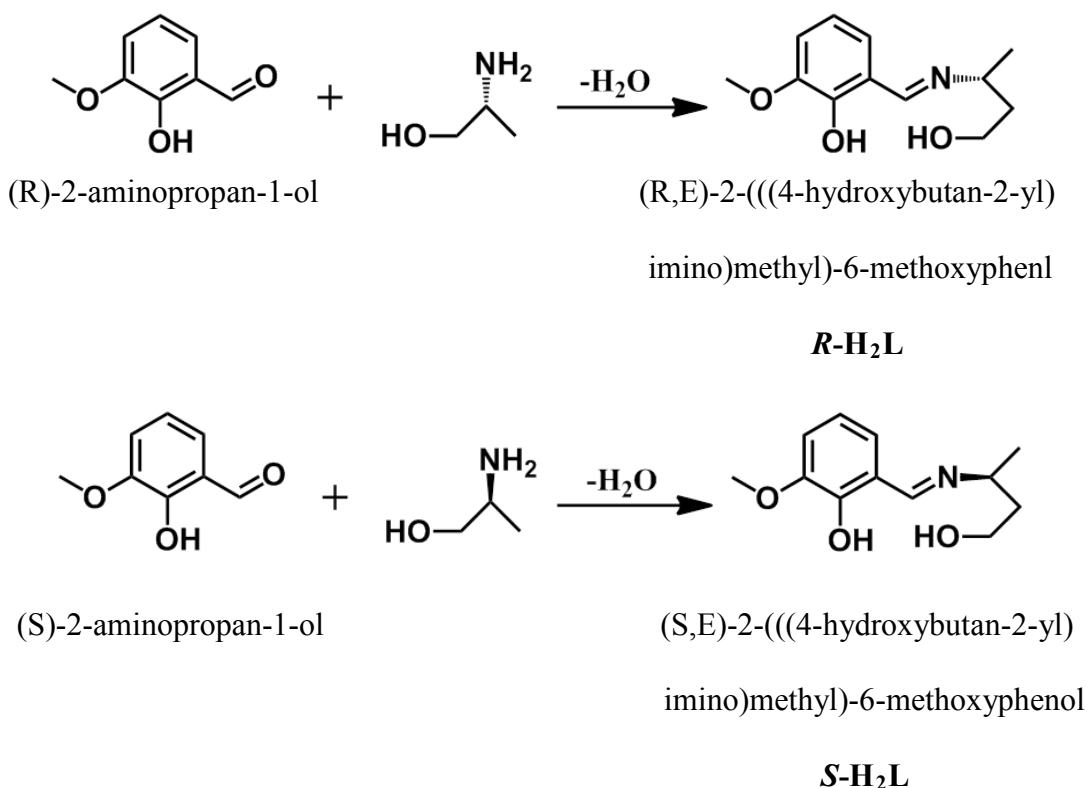

**Scheme S1.** In situ condensation of the enantiomeric Schiff base ligands.

**Table S1.** Selected bond lengths (Å) and angles (°) for compound **R-1** (CCDC 937457).

| Bond lengths [Å] |            |             |            |
|------------------|------------|-------------|------------|
| Cl1-Mn3          | 2.4719(10) | Mn3-N2      | 1.978(3)   |
| Cl1-Mn4          | 2.7260(10) | Mn3-O2      | 1.898(2)   |
| Cl2-Mn2          | 2.6112(10) | Mn3-O3      | 1.879(2)   |
| Cl2-Mn4          | 2.6157(9)  | Mn3-O10     | 1.873(2)   |
| Mn1-N4           | 2.188(3)   | Mn4-N1      | 1.985(3)   |
| Mn1-N7           | 2.316(3)   | Mn4-O5      | 1.903(2)   |
| Mn1-O3           | 2.154(2)   | Mn4-O6      | 1.885(2)   |
| Mn1-O6           | 2.164(2)   | Mn4-O10     | 1.899(2)   |
| Mn1-O9           | 2.176(2)   | Na1-O1      | 2.513(3)   |
| Mn1-O11          | 2.199(3)   | Na1-O2      | 2.357(3)   |
| Mn2-N3           | 1.985(3)   | Na1-O4      | 2.501(3)   |
| Mn2-O8           | 1.909(2)   | Na1-O5      | 2.360(3)   |
| Mn2-O9           | 1.889(2)   | Na1-O7      | 2.460(3)   |
| Mn2-O10          | 1.893(2)   | Na1-O8      | 2.364(2)   |
| Mn2-O13          | 2.319(3)   |             |            |
| Bond angles [°]  |            |             |            |
| Mn3-Cl1-Mn4      | 74.87(3)   | O10-Mn2-O13 | 85.88(10)  |
| Mn2-Cl2-Mn4      | 75.14(3)   | O13-Mn2-Cl2 | 170.30(8)  |
| N4-Mn1-N7        | 85.56(11)  | N2-Mn3-Cl1  | 95.37(9)   |
| N4-Mn1-O11       | 84.10(13)  | O2-Mn3-Cl1  | 99.28(7)   |
| O3-Mn1-N4        | 168.12(10) | O2-Mn3-N2   | 90.27(11)  |
| O3-Mn1-N7        | 84.01(9)   | O3-Mn3-Cl1  | 99.64(8)   |
| O3-Mn1-O6        | 94.85(8)   | O3-Mn3-N2   | 83.24(10)  |
| O3-Mn1-O9        | 90.98(9)   | O3-Mn3-O2   | 160.49(10) |
| O3-Mn1-O11       | 90.32(12)  | O10-Mn3-Cl1 | 88.57(7)   |
| O6-Mn1-N4        | 95.55(9)   | O10-Mn3-N2  | 175.76(11) |
| O6-Mn1-N7        | 178.83(10) | O10-Mn3-O2  | 90.65(9)   |
| O6-Mn1-O9        | 91.44(8)   | O10-Mn3-O3  | 94.57(9)   |
| O6-Mn1-O11       | 89.25(10)  | Cl2-Mn4-Cl1 | 165.12(3)  |

---

|             |            |             |            |
|-------------|------------|-------------|------------|
| O9-Mn1-N4   | 94.47(10)  | N1-Mn4-Cl1  | 96.56(8)   |
| O9-Mn1-N7   | 88.84(10)  | N1-Mn4-Cl2  | 98.25(8)   |
| O9-Mn1-O11  | 178.47(12) | O6-Mn4-N1   | 84.30(10)  |
| O11-Mn1-N7  | 90.49(12)  | O6-Mn4-O5   | 174.73(10) |
| N3-Mn2-Cl2  | 93.82(8)   | O6-Mn4-O10  | 93.41(9)   |
| N3-Mn2-O13  | 95.72(11)  | O10-Mn4-Cl1 | 80.84(7)   |
| O8-Mn2-Cl2  | 88.63(7)   | O10-Mn4-Cl2 | 84.43(7)   |
| O8-Mn2-N3   | 90.17(11)  | O10-Mn4-N1  | 176.49(11) |
| O8-Mn2-O13  | 89.64(9)   | O10-Mn4-O5  | 91.08(9)   |
| O9-Mn2-Cl2  | 95.60(7)   | O2-Na1-O1   | 64.10(8)   |
| O9-Mn2-N3   | 83.97(10)  | O2-Na1-O4   | 113.98(9)  |
| O9-Mn2-O8   | 172.98(9)  | O2-Na1-O5   | 104.64(9)  |
| O9-Mn2-O10  | 93.50(9)   | O2-Na1-O7   | 146.54(10) |
| O9-Mn2-O13  | 87.10(9)   | O2-Na1-O8   | 103.60(9)  |
| O10-Mn2-Cl2 | 84.67(7)   | O4-Na1-O1   | 92.31(9)   |
| O10-Mn2-N3  | 176.93(11) | O5-Na1-O1   | 149.60(10) |
| O10-Mn2-O8  | 92.47(9)   | O5-Na1-O4   | 65.56(8)   |
| O5-Mn4-Cl1  | 85.92(7)   | O5-Na1-O7   | 108.61(9)  |
| O5-Mn4-Cl2  | 92.35(7)   | O5-Na1-O8   | 102.34(9)  |
| O5-Mn4-N1   | 91.08(10)  | O7-Na1-O1   | 88.12(10)  |
| O6-Mn4-Cl1  | 92.06(7)   | O7-Na1-O4   | 83.74(9)   |
| O6-Mn4-Cl2  | 90.84(7)   | O8-Na1-O1   | 107.71(9)  |
| Mn2-O10-Mn4 | 114.42(11) | O8-Na1-O4   | 142.24(9)  |
| Mn3-O10-Mn2 | 127.86(12) | O8-Na1-O7   | 65.82(8)   |
| Mn3-O10-Mn4 | 114.15(11) |             |            |

---

**Table S2.** Bond valence sum calculation for Mn atoms in **R-1**.

| Mn site | Mn <sup>II</sup> | Mn <sup>III</sup> | Mn <sup>IV</sup> |
|---------|------------------|-------------------|------------------|
| Mn1     | <u>2.104</u>     | 1.972             | 1.911            |
| Mn2     | 3.450            | <u>3.244</u>      | 3.164            |
| Mn3     | 3.138            | <u>3.242</u>      | 3.168            |
| Mn4     | 3.417            | <u>3.230</u>      | 3.163            |

*Note.* The underlined value is the calculation of its closest charge and input oxidation state of a particular atom is in good agreement.

**Table S3.** Selected bond lengths (Å) and angles (°) for compound **R-2** (CCDC 937458).

| Bond lengths[Å] |          |         |          |
|-----------------|----------|---------|----------|
| Mn1-N7          | 2.298(5) | Mn6-N13 | 2.206(5) |
| Mn1-N22         | 2.444(4) | Mn6-O2  | 1.900(4) |
| Mn1-N26         | 2.001(4) | Mn6-O3  | 1.889(4) |
| Mn1-O16         | 1.894(3) | Mn6-O25 | 1.880(4) |
| Mn1-O17         | 1.916(3) | Mn7-N10 | 1.969(5) |
| Mn1-O24         | 1.894(3) | Mn7-N16 | 2.267(5) |
| Mn2-N7          | 2.320(5) | Mn7-O5  | 1.905(3) |
| Mn2-N27         | 1.973(5) | Mn7-O6  | 1.889(3) |
| Mn2-O8          | 1.910(3) | Mn7-O25 | 1.882(4) |
| Mn2-O9          | 1.883(3) | Mn7-O26 | 2.428(7) |
| Mn2-O24         | 1.894(3) | Mn8-N12 | 1.970(5) |
| Mn2-O27         | 2.361(5) | Mn8-N13 | 2.316(5) |
| Mn3-N22         | 2.257(4) | Mn8-N16 | 2.345(5) |
| Mn3-N25         | 1.994(4) | Mn8-O11 | 1.920(4) |
| Mn3-O14         | 1.893(3) | Mn8-O12 | 1.906(3) |
| Mn3-O15         | 1.878(3) | Mn8-O25 | 1.900(4) |

|                        |            |             |            |
|------------------------|------------|-------------|------------|
| Mn3-O24                | 1.868(3)   | Na2-O7      | 2.442(4)   |
| Mn4-N1                 | 2.262(14)  | Na2-O8      | 2.377(4)   |
| Mn4-N4                 | 2.311(4)   | Na2-O13     | 2.474(4)   |
| Mn4-N19                | 2.246(5)   | Na2-O14     | 2.388(4)   |
| Mn4-O9                 | 2.135(4)   | Na2-O17     | 2.390(4)   |
| Mn4-O15                | 2.154(3)   | Na2-O18     | 2.482(4)   |
| Mn4-O16                | 2.125(3)   | Na2-O24     | 2.748(4)   |
| Mn5-N1                 | 2.312(15)  | Na1-O1      | 2.573(5)   |
| Mn5-N4                 | 2.345(5)   | Na1-O2      | 2.392(5)   |
| Mn5-N19                | 2.243(4)   | Na1-O4      | 2.515(4)   |
| Mn5-O3                 | 2.142(4)   | Na1-O5      | 2.400(4)   |
| Mn5-O6                 | 2.116(4)   | Na1-O10     | 2.498(5)   |
| Mn5-O12                | 2.120(4)   | Na1-O11     | 2.423(5)   |
| Mn6-N11                | 1.981(5)   | Na1-O25     | 2.713(4)   |
| <b>Bond angles [°]</b> |            |             |            |
| N26-Mn1-N7             | 102.13(16) | N12-Mn8-N13 | 99.69(18)  |
| N26-Mn1-N22            | 100.37(15) | N12-Mn8-N16 | 102.94(19) |
| O16-Mn1-N7             | 91.83(16)  | N13-Mn8-Na1 | 83.85(12)  |
| O16-Mn1-N22            | 86.02(14)  | O11-Mn8-N12 | 90.53(18)  |
| O16-Mn1-N26            | 84.44(15)  | O11-Mn8-N13 | 92.50(17)  |
| O17-Mn1-N7             | 91.14(16)  | O11-Mn8-N16 | 91.30(16)  |
| O17-Mn1-N22            | 92.86(14)  | O11-Mn8-Na1 | 41.51(13)  |
| O17-Mn1-N26            | 90.85(16)  | O12-Mn8-N12 | 83.86(17)  |
| O24-Mn1-N7             | 80.50(16)  | O12-Mn8-N13 | 91.30(16)  |
| O24-Mn1-N22            | 76.82(14)  | O12-Mn8-N16 | 87.16(17)  |
| O24-Mn1-O16            | 92.64(14)  | O25-Mn8-N13 | 78.43(16)  |
| O24-Mn1-O17            | 91.97(14)  | O25-Mn8-N16 | 78.80(16)  |
| N27-Mn2-N7             | 95.52(19)  | O25-Mn8-O11 | 91.80(16)  |
| N27-Mn2-O27            | 105.3(2)   | O25-Mn8-O12 | 93.91(15)  |
| O8-Mn2-N7              | 93.99(16)  | Mn4-N1-Mn5  | 88.3(3)    |
| O8-Mn2-N27             | 91.28(17)  | Mn4-N4-Mn5  | 86.34(15)  |

---

|             |           |             |            |
|-------------|-----------|-------------|------------|
| O8-Mn2-O27  | 85.30(17) | Mn1-N7-Mn2  | 86.02(15)  |
| O9-Mn2-N7   | 92.85(17) | Mn6-N13-Mn8 | 87.46(16)  |
| O9-Mn2-N27  | 83.67(18) | Mn7-N16-Mn8 | 86.02(16)  |
| O9-Mn2-O24  | 95.12(15) | Mn5-N19-Mn4 | 90.42(18)  |
| O9-Mn2-O27  | 89.87(17) | Mn3-N22-Mn1 | 84.90(14)  |
| O24-Mn2-N7  | 79.93(15) | O1-Na1-O25  | 128.57(16) |
| O24-Mn2-O8  | 90.41(14) | O2-Na1-O1   | 63.98(14)  |
| O24-Mn2-O27 | 79.21(18) | O2-Na1-O4   | 121.87(19) |
| N25-Mn3-N22 | 99.13(17) | O2-Na1-O5   | 108.34(15) |
| O14-Mn3-N22 | 92.03(15) | O2-Na1-O10  | 136.83(17) |
| O14-Mn3-N25 | 90.37(16) | O2-Na1-O11  | 99.19(15)  |
| O15-Mn3-N22 | 99.48(15) | O2-Na1-O25  | 64.62(13)  |
| O15-Mn3-N25 | 83.62(16) | O4-Na1-O1   | 84.51(15)  |
| O24-Mn3-N22 | 82.28(15) | O4-Na1-O25  | 125.36(14) |
| O24-Mn3-O14 | 91.77(14) | O5-Na1-O1   | 137.91(17) |
| O24-Mn3-O15 | 93.99(14) | O5-Na1-O4   | 64.19(13)  |
| N1-Mn4-N4   | 76.5(3)   | O5-Na1-O10  | 113.22(17) |
| N19-Mn4-N1  | 78.5(4)   | O5-Na1-O11  | 98.84(15)  |
| N19-Mn4-N4  | 76.89(16) | O5-Na1-O25  | 63.16(12)  |
| O9-Mn4-N1   | 98.3(4)   | O10-Na1-O1  | 91.29(16)  |
| O9-Mn4-N4   | 93.68(16) | O10-Na1-O4  | 87.35(18)  |
| O9-Mn4-O15  | 92.49(14) | O10-Na1-O25 | 126.37(17) |
| O15-Mn4-N4  | 96.76(15) | O11-Na1-O1  | 123.00(16) |
| O15-Mn4-N19 | 89.90(15) | O11-Na1-O4  | 138.40(19) |
| O16-Mn4-N1  | 89.8(3)   | O11-Na1-O10 | 63.82(15)  |
| O16-Mn4-N19 | 95.26(14) | O11-Na1-O25 | 64.28(12)  |
| O16-Mn4-O9  | 93.66(14) | O7-Na2-O13  | 85.35(14)  |
| O16-Mn4-O15 | 95.71(13) | O7-Na2-O18  | 88.21(15)  |
| N1-Mn5-N4   | 74.9(4)   | O7-Na2-O24  | 126.26(14) |
| N19-Mn5-N1  | 77.5(3)   | O8-Na2-O7   | 65.29(13)  |
| N19-Mn5-N4  | 76.23(16) | O8-Na2-O13  | 140.20(16) |
| O3-Mn5-N1   | 92.9(4)   | O8-Na2-O14  | 105.65(14) |

---

---

|             |           |             |            |
|-------------|-----------|-------------|------------|
| O3-Mn5-N19  | 94.18(16) | O8-Na2-O17  | 99.09(14)  |
| O6-Mn5-N1   | 96.2(3)   | O8-Na2-O18  | 115.84(16) |
| O6-Mn5-N4   | 96.05(15) | O8-Na2-O24  | 63.07(11)  |
| O6-Mn5-O3   | 92.51(15) | O13-Na2-O18 | 87.87(15)  |
| O6-Mn5-O12  | 93.68(14) | O13-Na2-O24 | 128.24(13) |
| O12-Mn5-N4  | 96.07(16) | O14-Na2-O7  | 120.45(16) |
| O12-Mn5-N19 | 91.70(15) | O14-Na2-O13 | 65.63(12)  |
| O12-Mn5-O3  | 94.76(14) | O14-Na2-O17 | 99.32(13)  |
| N11-Mn6-N13 | 98.6(2)   | O14-Na2-O18 | 137.00(16) |
| O2-Mn6-N11  | 90.5(2)   | O14-Na2-O24 | 62.98(11)  |
| O2-Mn6-N13  | 94.80(17) | O17-Na2-O7  | 139.57(16) |
| O3-Mn6-N11  | 83.9(2)   | O17-Na2-O13 | 120.39(15) |
| O3-Mn6-N13  | 95.91(17) | O17-Na2-O18 | 64.45(13)  |
| O25-Mn6-N13 | 81.71(17) | O17-Na2-O24 | 64.01(11)  |
| O25-Mn6-O2  | 92.99(16) | O18-Na2-O24 | 127.24(14) |
| O25-Mn6-O3  | 92.50(16) | Mn6-O3-Mn5  | 125.7(2)   |
| N10-Mn7-N16 | 94.9(2)   | Mn7-O6-Mn5  | 123.23(18) |
| N10-Mn7-O26 | 105.7(2)  | Mn2-O9-Mn4  | 123.25(18) |
| O5-Mn7-N10  | 91.00(16) | Mn8-O12-Mn5 | 124.89(18) |
| O5-Mn7-N16  | 93.39(17) | Mn3-O15-Mn4 | 122.77(17) |
| O5-Mn7-O26  | 85.42(19) | Mn1-O16-Mn4 | 125.61(17) |
| O6-Mn7-N10  | 83.53(17) | Mn2-O24-Mn1 | 112.55(17) |
| O6-Mn7-N16  | 96.72(17) | Mn3-O24-Mn1 | 115.18(17) |
| O6-Mn7-O26  | 86.74(19) | Mn3-O24-Mn2 | 128.53(18) |
| O25-Mn7-N16 | 81.24(17) | Mn6-O25-Mn7 | 131.4(2)   |
| O25-Mn7-O5  | 90.57(15) | Mn6-O25-Mn8 | 111.62(17) |
| O25-Mn7-O6  | 95.54(15) | Mn7-O25-Mn8 | 112.61(19) |
| O25-Mn7-O26 | 78.2(2)   |             |            |

---

**Table S4.** Bond valence sum calculation for Mn atoms in **R-2**.

| Mn site | Mn <sup>II</sup> | Mn <sup>III</sup> | Mn <sup>IV</sup> |
|---------|------------------|-------------------|------------------|
| Mn1     | 3.395            | <u>3.184</u>      | 3.084            |
| Mn2     | 3.485            | <u>3.259</u>      | 3.161            |
| Mn3     | 3.358            | <u>3.142</u>      | 3.046            |
| Mn4     | <u>2.111</u>     | 1.991             | 1.926            |
| Mn5     | <u>2.104</u>     | 1.981             | 1.918            |
| Mn6     | 3.323            | <u>3.161</u>      | 3.063            |
| Mn7     | 3.512            | <u>3.286</u>      | 3.185            |
| Mn8     | 3.467            | <u>3.261</u>      | 3.158            |

*Note.* The underlined value is the calculation of its closest charge and input oxidation state of a particular atom is in good agreement.
